# Supplementary material
Source: Elsevier journal article supplement (https://www.sciencedirect.com/science/article/pii/S2253808922000556)
Supplement: mmc1 [file S2253808922000556:mmc1.docx]

**ANNEX participating centers**

(*) Hospitals that perform radioguided surgery (*) Hospitals that also use seeds (*) Hospitals that only use wire.

Andalucía:

Hospital Universitario Clínico San Cecilio (Granada) (*)

Hospital Punta De Europa (Algeciras) (*)

Complejo Hospitalario de Jaén (*)

Hospital Universitario Virgen de las Nieves (Granada) (*)

Hospital Regional Universitario de Málaga (*)

Hospital Universitario Virgen Macarena (Sevilla) (*)

Hospital Universitario Virgen del Rocío (Sevilla) (*)

Hospital Juan Ramón Jiménez (Huelva) (*)

Hospital Universitario Puerta del Mar (Cádiz) (*)

Hospital Universitario TORRECARDENAS (Almería) (*)

Anonymous (*)

Aragón:

Hospital Clínico Universitario "Lozano Blesa" (Zaragoza) (*)

Balearic Islands:

Hospital Universitario Son Espases, (*)

Canary Islands:

Hospital Universitario Canarias (Sta. Cruz de Tenerife) (*)

Hospital Universitario Nuestra Señora de Candelaria (HUNSC) (*)

Cantabria:

Hospital Universitario Marqués de Valdecilla, Santander (*)

Castilla and León:

Hospital Universitario de Burgos (*)

Hospital Clínico universitario de Valladolid (*)

Castilla-La Mancha:

Hospital General Universitario de Ciudad Real (*)

Cataluña:

Hospital Germans Trias i Pujo ( Badalona) (*)

Hospital Universitario de Bellvitge, L'Hospitalet de Llobregat (Barcelona) (*)

Hospital del Mar (Barcelona) (*)

HU Joan XXIII (Tarragona) (*)

Hospital Universitari Sant Joan de Reus (*)

Hospital Clínic (Barcelona) (*)

Hospital de la Santa Creu i Sant Pau (Barcelona) (*)

Hospital Universitari Doctor Josep Trueta de Girona (*)

Hospital Vall d’Hebron(*)

Unitat de Medicina Nuclear IDI Lleida (Hospital Arnau de Vilanova) (*)

Community of Madrid:

Hospital Universitario de La Princesa (Madrid) (*)

Hospital HM Vallés (*)

Hospital Universitario La Paz (*)

Grupo HM Hospitales, (*)

Hospital Universitario Puerta de Hierro de Majadahonda (Madrid) (*)

Hospital Universitario Ramón y Cajal (*)

Hospital Universitario Quirón (Madrid) (*)

Hospital Universitaria 12 de Octubre (Madrid) (*)

Hospital Universitario de Getafe (Madrid) (*)

HM Hospitales (*)

Hospital clínico San Carlos (*)

Hospital General de Villalba- Madrid (*)

Community of Valencia:

H.U.P La Fe (Valencia) (*)

Hospital Clínico Universitario de Valencia (*)

Hospital Universitario Dr. Peset de Valencia (*)

Hospital Universitario del Vinalopó de Elche (*)

Vithas Hospital Medimar Internacional (Alicante) (*)

Extremadura:

Complejo Hospitalario Universitario de Badajoz (*)

Galicia:

Hospital POVISA (Vigo) (*)

Hospital Meixoeiro (Vigo) (*)

Complexo Hospitalario Universitario de Ourense (*)

Hospital Clínico Universitario de Santiago de Compostela (*)

Hospital Lucus Augusti (Lugo) (*)

Navarra:

Clínica Universitaria de Navarra (*)

Complejo Hospitalario de Navarra (*)

Basque country:

Organización Sanitaria Integrada de Álava-Osakidetza (*)
